# Supplementary material for: Waiting time ambulances in the Emergency Department; a Dutch single center study (WAITED study)
Source: Research Square preprint supplement (doi:10.21203/rs.3.rs-7364802/v1), 2025-09-23
Supplement: Supplementary file 1 [file 9198fdfa9d6188ff765b0867.docx]

**Supplemental figure 1.** Paper questionnaire in Dutch

**Registratieformulier WAITED studie**

**Datum:**

**Locatie:**

**Tijdstip aankomst ambulance op SEH:**

**Tijdstip aankomst op behandelkamer:**

**Kleur stoplicht tijdens wachten:**(omcirkelen, één antwoord mogelijk)

- Groen
- Oranje
- Rood

**Urgentie ambulancerit:**(omcirkelen, één antwoord mogelijk)

- A1
- A2
- B

**Reden van wachttijd:**(omcirkelen, één antwoord mogelijk)

- Helemaal geen behandelkamer beschikbaar
- Geen geschikte behandelkamer beschikbaar (bijv. Verdenking collumfractuur, maar traumakamer is bezet)
- Geen SEH-personeel beschikbaar
- Niet beschikbaar zijn van VECO
- Calamiteit / Technische storing

**Interventies tijdens wachten op SEH:**(omcirkelen, meerdere opties mogelijk)

- Geen interventies
- Infuus geprikt
- Infuusvloeistof gegeven
- Medicatie gegeven, namelijk:
- Controles nogmaals uitgevoerd
- Lab afgenomen
- Virale keelswab afgenomen
- ECG
- Anders, namelijk:
